# Supplementary material for: Molecular Drivers of Multiple and Elevated Resistance to Insecticides in a Population of the Malaria Vector Anopheles gambiae in Agriculture Hotspot of West Cameroon
Source: MDPI journal article supplement (doi:10.3390/genes13071206), 2022-07-06
Supplement: s1 [file s1]

## Supplementary material

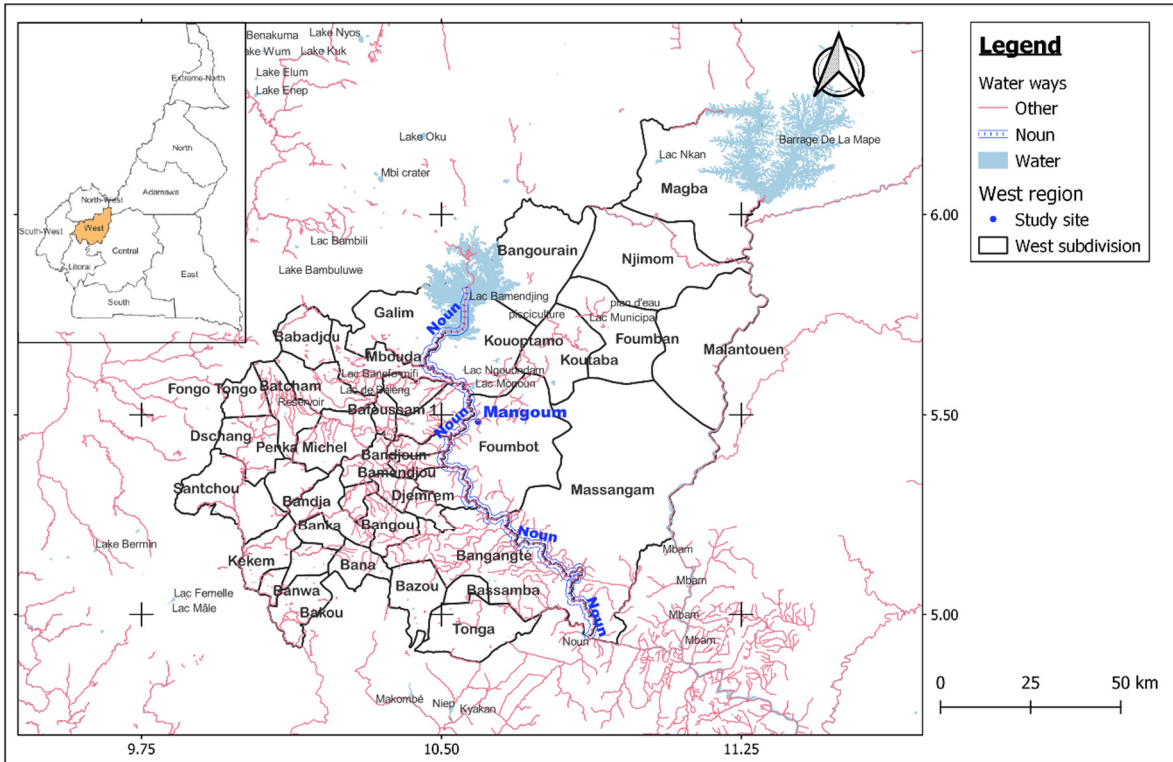

Figure S1: Map of the sampling sites.

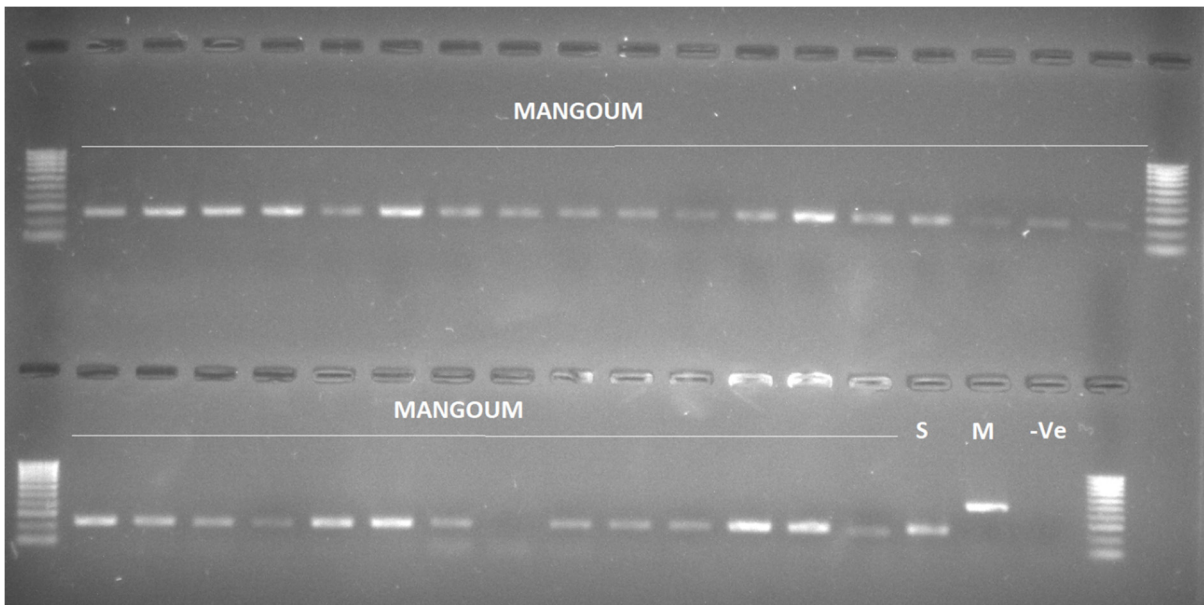

Figure S2: Electrophoresis gel of SINE PCR for identification.

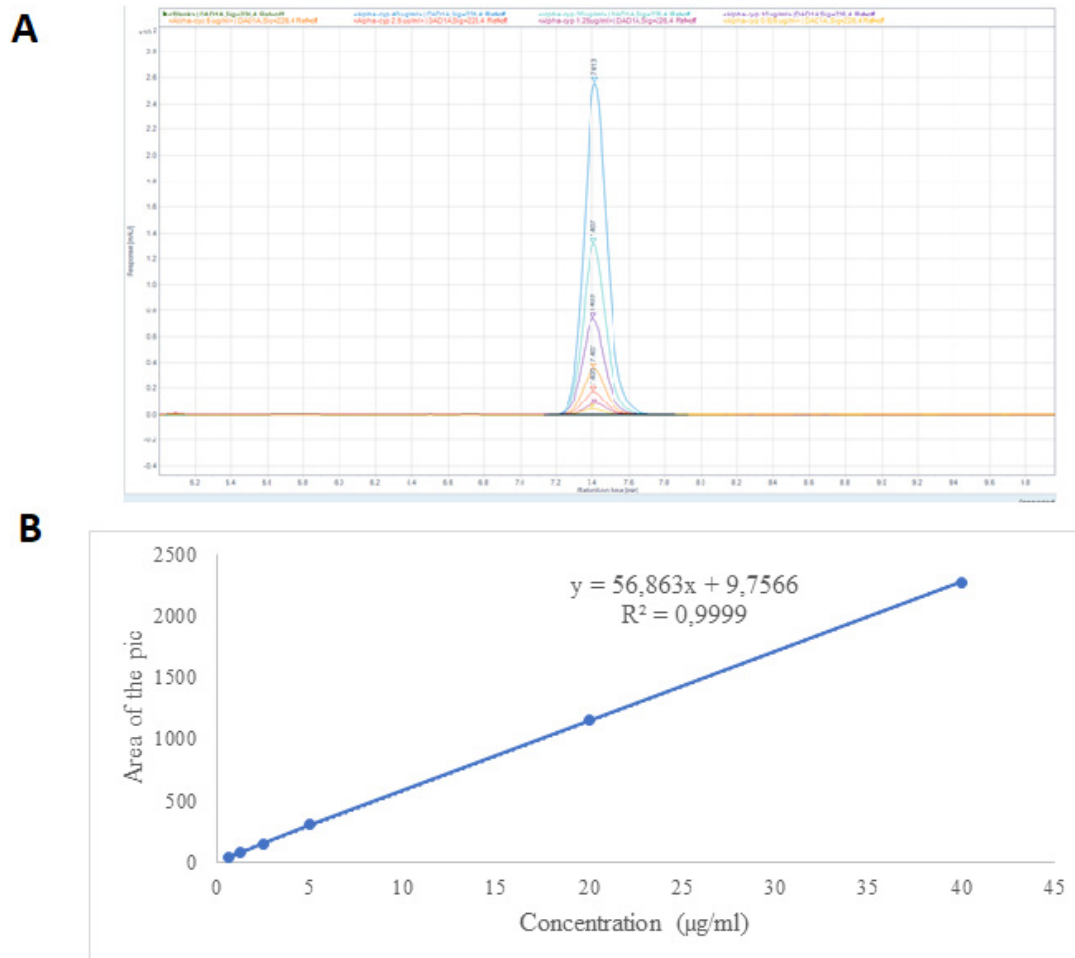

Figure S3: The chromatogram overlay of the serial dilutions of alpha-cypermethrin (**A**) and the Standard curve of alpha-cypermethrin used for concentration extrapolation (**B**).

Table S1: List of primers used

| Primer set | Primer sequence (5'–3')   | Size of PCR product using cDNA template | Purpose       |
|------------|---------------------------|-----------------------------------------|---------------|
| EFq_F      | GGCAAGAGGCATAACGATCAATGCG | 110 bp                                  | Real time PCR |
| EFq_R      | GTCCATCTGCGACGCTCCGG      |                                         |               |
| RPS7q_F    | CCACCATCGAACACAAAGTTGA    | 117 bp                                  | Real time PCR |
| RPS7q_R    | TGCTGCAAACTTCGGCTATTC     |                                         |               |
| 6M2q_F     | CTGGCGTTGAATCCAGAGGT      | 144 bp                                  | Real time PCR |
| 6M2q_R     | GATACTTGCAGTGATTCAATTAAG  |                                         |               |
| 6P3q_F     | ACAATGTGATTGACGAAACCCT    | 101 bp                                  | Real time PCR |
| 6P3q_R     | GGATCACATGCTTTGTGCCG      |                                         |               |
| 6P1q_F     | ACAGGTGGTGAACGAAACCC      | 75 bp                                   | Real time PCR |
| 6P1q_R     | GGTGAATCCTGTCCCGCAA       |                                         |               |
| 9K1q_F     | CCGACACGTGGTGATGGATAC     | 175 bp                                  | Real time PCR |
| 9K1q_R     | CGTCGTCGGTCCAGTCAAC       |                                         |               |
| 6P4q_F     | CTGGACAACGTTATCAATGAAACC  | 84 bp                                   | Real time PCR |

|            |                               |        |               |
|------------|-------------------------------|--------|---------------|
| 6P4q_R     | GCACGGTGTAATCACGCATC          |        |               |
| 6Z1q_F     | CCCGCCAACTGTATCGGTCTG         | 138 bp | Real time PCR |
| 6Z1q_R     | TTCGGTGCCAGTGTGATTGA          |        |               |
| 6Z2q_F     | AGGCCACGAAGAACTACGAT          | 154 bp | Real time PCR |
| 6Z2q_R     | ACTTTTGCAGGAGTTGTGGC          |        |               |
| Gste2q_F   | CCGGAATTTGTGAAGCTAAACC        | 147 bp | Real time PCR |
| Gste2q_R   | GCTTGACGGGGTCTTTCGG           |        |               |
| 4G16q_F    | GTCCAAGAAGTTGCGTCGGAC         | 186 bp | Real time PCR |
| 4G16q_R    | TCTTCGATTTGCGTTGACGTG         |        |               |
| 4G17q_F    | TGTCACGACTACATGAGCGA          | 157 bp | Real time PCR |
| 4G17q_R    | CGCAGGTGGATCTTCAGTTG          |        |               |
| SAP1_F     | TTTGATCCGGAGAACAAGTAC         | 92 bp  | Real time PCR |
| SAP1_R     | CGTTCTTCCGGGTTTCCA            |        |               |
| SAP2_F     | CTACTTCAAGTGCCTGATGG          | 250 bp | Real time PCR |
| SAP2_R     | CTTGATGCCCTCCTTCTTG           |        |               |
| SAP3_F     | GAGAAGCAGAAGAGTGGCAC          | 150 bp | Real time PCR |
| SAP3_R     | ACAGGTTGATGCCCTTCTTC          |        |               |
| Plas_F     | GCTTAGTTACGATTAATAGGAGTAGCTTG |        | TaqMan        |
| Plas_R     | GAAAATCTAAGAATTCACCTCTGACA    |        |               |
| Falcip+FAM | TCTGAATACGAATGTC              |        |               |
| OVM+HEX    | CTGAATACAAATGCC               |        |               |

---
